# Supplementary material for: Squamous Cell Carcinoma Arising from Chronic Osteomyelitis in the Extremities: Treatment Approach and Oncological Outcomes—A Systematic Review of the Literature
Source: J Skin Cancer. 2022 Oct 10;2022:2671420. doi: 10.1155/2022/2671420 (PMC9576437; doi:10.1155/2022/2671420)
Supplement: Supplementary Materials — Supplementary material 1. Quality assessment CARE checklist. Supplementary material 2. Quality assessment STROBE checklist. [file 2671420.f1.zip]

Archive with 2 entries (2 files):
- Supplementary material 1.docx
- Supplementary material 2.docx
